# Supplementary material
Source: bioRxiv or medRxiv preprint supplement (https://www.biorxiv.org/highwire/filestream/82684/field_highwire_adjunct_files/10/269498-9.pdf)

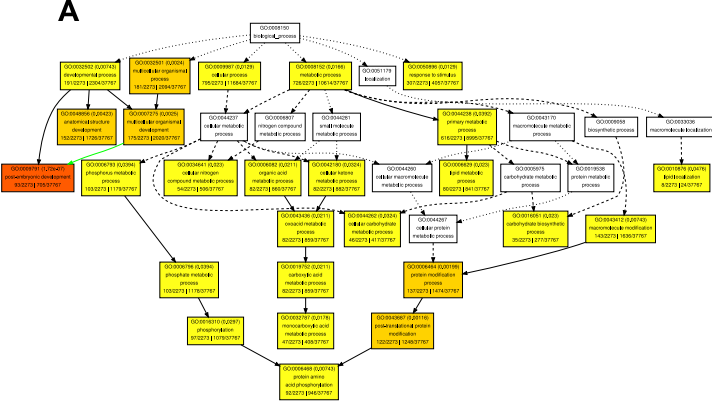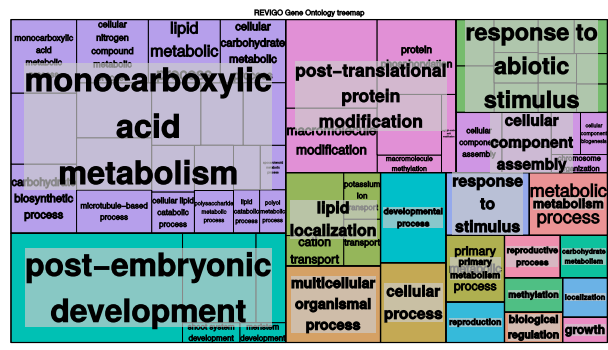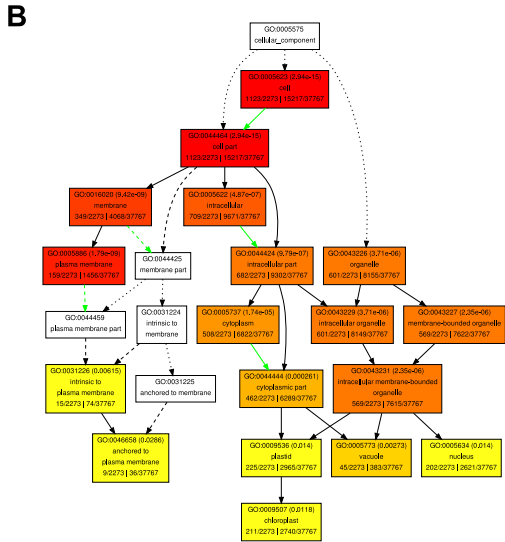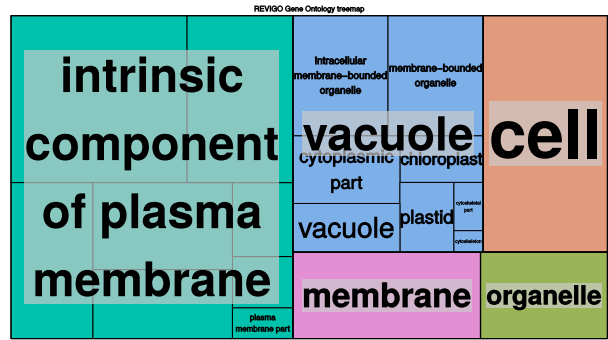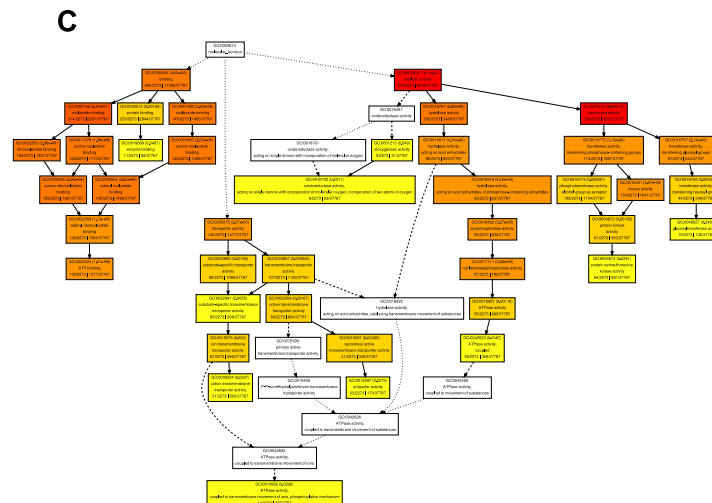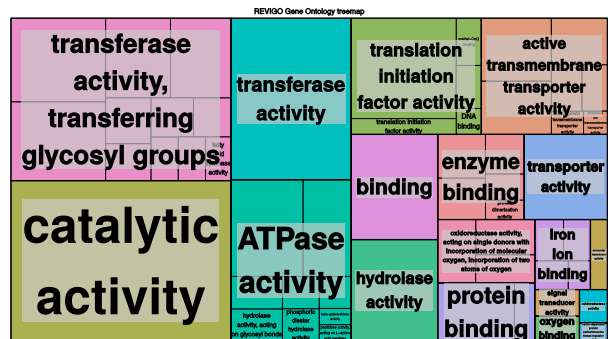

Supplement: Supplementary file [file 269498-9.pdf]
